# Supplementary material for: Co-Creation and Prototyping of An Intervention Focusing On Health Literacy In Management of Malaria At Community-Level In Ghana
Source: Research Square preprint supplement (doi:10.21203/rs.3.rs-123009/v1), 2020-12-10
Supplement: Supplementary file 1 [file 8fef871486385b1bde49cb0a.docx]

| **Section and topic** | **Item** | **Reported on page No** |
| --- | --- | --- |
| 1: Aim | Report the aim of PPI in the study | Page 5 |
| 2: Methods | Provide a clear description of the methods used for PPI in the study | Pages 5 to 12 |
| 3: Study results | Outcomes—Report the results of PPI in the study, including both positive and negative outcomes | Pages 13 to 20 |
| 4: Discussion and conclusions | Outcomes—Comment on the extent to which PPI influenced the study overall. Describe positive and negative effects | Pages 20 to 22 |
| 5: Reflections/critical perspective | Comment critically on the study, reflecting on the things that went well and those that did not, so others can learn from this experience | Page 22-23 |
